# Supplementary material for: The impact of glutamate infusion on postoperative NT-proBNP in patients undergoing coronary artery bypass surgery: a randomized study
Source: J Transl Med. 2020 May 11;18:193. doi: 10.1186/s12967-020-02351-7 (PMC7216679; doi:10.1186/s12967-020-02351-7)
Supplement: Supplementary file 1 — Additional file 1. List additional methods and results on NT-proBNP in patients treated with inotropes related to glutamate (Table S1–S3). [file 12967_2020_2351_MOESM1_ESM.doc]

**ADDITIONAL FILE**

**The impact of glutamate infusion on postoperative NT-proBNP in patients undergoing coronary artery bypass surgery**

A prespecified substudy of the GLUTAMICS-trial - GLUTAmate for Metabolic Intervention in Coronary Surgery (ClinicalTrials.gov Identifier: [NCT00489827](http://clinicaltrials.gov/ct2/show/NCT00489827)).

**THE GLUTAMICS TRIAL**

The GLUTAMICS trial was an investigator-initiated prospective randomized controlled trial evaluating metabolic intervention with intravenous glutamate infusion in association with surgery for acute coronary syndrome [1].

The primary endpoint was a composite of postoperative mortality (30 days), perioperative myocardial infarction and left ventricular heart failure in association with weaning from cardiopulmonary bypass or after completion of off-pump coronary artery bypass surgery.

Postoperative mortality and stroke with 24 hours of surgery were safety endpoints.

The study was approved by the Swedish Medical Products Agency (151:2003/70403) and the Regional Ethical Review Board in Linköping (M76-05). Amendments were accepted by the Swedish Medical Products Agency 2006-08-31, 2007-05-08, 2007-11-01 and 2007-11-19.

External randomization in variable block sizes was done by Apoteket AB, Produktion & Laboratorier (APL), Box 6124, SE 90604, Umeå, Sweden.

External monitoring of all key data was done by an independent professional monitoring team (Clinical Research Support: <http://www.orebroll.se/crs>). Recording of adverse events was done according to Good Clinical Practice standard.

**INTERVENTION**

**Glutamate solution**

500 ml 0.125 M solution of L-glutamic acid with pH 6.0 and 280 mosmol/kg containing L-glutamic acid 9.2 g, NaCl 0.8g, H2O ad 500 ml and NaOH quantum satis.

Production of glutamate solution and quality control was done by Apoteket AB, Produktion & Laboratorier (APL), Box 6124, SE 90604 Umeå, Sweden.

The patients were randomly allocated to blinded intravenous infusion of 0.125M L-glutamic acid solution or saline at a rate of 1.65mL/kg of body weight per hour beginning at the induction of anesthesia. The dosage of glutamate was determined from studies demonstrating that an infusion rate of 30 to 40 mg glutamate/kg of body weight per hour increased arterial whole bold levels by two- to threefold, sufficient to meet the myocardial demands or to saturate the myocardial capacity to extract glutamate from the circulation[2]. The infusion was temporarily stopped during cardioplegic arrest and resumed after declamping the aorta for an additional 2 hours, after which the infusion rate was halved and an additional 50 mL infused. The maximum volume infused to any patient was 500 mL of study solution.

**NT-proBNP analyses**

Venous blood samples for NT-proBNP were drawn at three time points: before induction of anesthesia, the first and third morning after surgery.NT-proBNP was measured with electro-chemoiluminescence immunoassay on a Roche Elecsys 2010 automated platform (Roche Diagnostics, Basel, Switzerland). The assay had an effective measuring range of 5 - 35 000 ng/L. The inter-assay coefficient of variation was at 175 ng/L CV=2.7%, 355 ng/L CV=2.4% and 1068 ng/L CV=1.9%. The NT-proBNP results were released from the laboratory when the trial was terminated.

**INCLUSION CRITERIA**

Inclusion criteria were coronary artery bypass surgery for acute coronary syndrome. Patients were eligible for inclusion regardless if the procedure was done on-pump or off-pump or if the patient had a simultaneous valve procedure.

**EXCLUSION CRITERIA**

Exclusion criteria were, informed consent not possible because of critical condition or other reason, preoperative use of inotropic drugs or mechanical circulatory assist, preoperative dialysis, redo-procedure, unexpected intraoperative finding or event that increased the magnitude of the procedure to overshadow the originally planned operation, age > 85 years, body weight > 125 kg and food allergy known to have caused flush, rash or asthma.

**CLINICAL ENDPOINTS COMMITTEE**

The clinical endpoints committee consisted of consultants in cardiothoracic surgery and cardiothoracic anesthesiology from each of the participating centers. The members of the committee were blinded to the treatment assignment and prespecified criteria reported in the manuscript were used to reach a consensus decision. The committee was also blinded to the results of the NT-proBNP analyses.

All cases with suspected postoperative heart failure (PHF) based on SvO2 and systemic blood pressure, pulmonary artery pressure, central venous pressure, use of inotropic drugs or mechanical circulatory support, extended ICU stay or circulatory problems reported by the anesthesiologists or surgeons in the clinical database were reviewed. The committee decided whether circulatory problems that met the prespecified criteria had occurred, if these circulatory problems were severe and if they were cardiac in origin, if they were evident at weaning from cardiopulmonary bypass or presented later in the postoperative course. The committee also decided if events leading to death were cardiac in origin.

Data on late mortality was retrieved from the Swedish Civil Registry and the cause for late mortality was retrieved from the Causes of Death Registry at the Swedish National Board of Health and Welfare.

**DEFINITIONS**

**Postoperative heart failure**

Patients were considered to have PHF if criteria a+b were fulfilled.

a) Decision reached by the Endpoints committee that heart failure was evident at weaning from cardiopulmonary bypass or during the early hours after surgery based on criteria below and supported by available clinical records, echocardiography and hemodynamic data.

b) SvO2 criteria in relation to SAP that could not be explained by shivering, anemia or hypovolemia. The criteria were based on extensive studies on SvO2 with regard to outcome and clinical experience regarding the relationship between SvO2 and SAP while using fast acting vasodilators [3-6].

SvO2 < 50%, SAP < 130 mm Hg

SvO2 < 55%, SAP < 110 mm Hg

SvO2 < 60%, SAP < 90 mm Hg

SvO2 < 65%, SAP < 70 mmHg

**Severe postoperative heart failure**

Patients who fulfilled criteria for PHF were considered to have had severe PHF if it was associated with extended treatment in ICU or death, i.e. criteria 1+2 or 3 were fulfilled.

1) ICU stay ≥ 48 hours (corresponding to at least 72 hours in a unit without a step-down semi-intensive care ward)

2) Use of intra-aortic balloon pump or need for at least one inotropic agent in dosages listed below ≥ 24 hours after admission to ICU

Epinephrine ≥ 0.033 μg/kg/min

Milrinone ≥ 0.375 μg/kg/min

Dopamine ≥ 4 μg/kg/min

Dobutamine ≥ 4μg/kg/min

Levosimendan regardless of dose + additional inotropic treatment in dosages above

3) Heart failure leading to mortality

**Preoperative Left ventricular dysfunction**

Moderate left ventricular dysfunction corresponds to an ejection fraction of 0.31 - 0.45 according to echocardiography. Severe left ventricular dysfunction corresponds to an ejection fraction of 0.30 or less.

**Postoperative Myocardial injury**

Myocardial injury was measured with Creatine Kinase-MB isoenzyme (CK-MB) on the first postoperative morning and with Troponin T on the third postoperative day. The time points for sampling were chosen with regard to the different release kinetics of these biomarkers in permanent myocardial injury [7].

**Hospital mortality**

Hospital mortality was defined as mortality during the first hospitalization period. This included postoperative stay at the referral hospital as a substantial proportion of patients were discharged to their county hospitals.

**Acute kidney injury**

Acute kidney injury (AKI) was defined as a postoperative increase of p-Creatinine by 50% or more compared with preoperative level in accordance with RIFLE-criteria.

**Postoperative stroke**

Postoperative stroke was defined as neurological or cognitive deficit with a cerebral injury verified on (Computed Tomography) CT-scan. All suspected cases of stroke underwent CT-scan.

**CLINICAL MANAGEMENT**

Clinical management was standardized and similar at the three participating centers with minor differences concerning choice of anesthetic drugs. After an overnight fast patients received beta-blockers and calcium antagonists orally whereas antihypertensive and antidiabetic agents were withheld. Standard premedication consisted of orally administered flunitrazepam 0.5-1.0 mg or diazepam 5-10 mg and ketobemidone 0.1-0.2 mg kg-1 body weight (BW) or morphine 0.1-0.2 mg kg-1 BW. Anesthesia was induced with thiopentone (2-3 mg kg-1 BW) or propofol (2 mg kg-1 BW) supplemented by a bolus dose of fentanyl 3-5 µg kg-1 BW. Muscle relaxation was achieved with pancuronium 0.1 mg kg-1 BW or rocuronium 0.6 mg kg-1 BW. Anesthesia was maintained with isoflurane, sevoflurane or propofol supplemented with intermittent doses of fentanyl.

Standard monitoring was used consisting of 5-lead echocardiogram, pulse oximetry, continuous arterial blood pressure monitoring using a cannula in the radial artery, central venous pressure and transesophageal echocardiography. A surgical pulmonary artery catheter was introduced in all patients.

Standard surgical techniques as described in the manuscript were employed. A median sternotomy was performed in all patients. Twelve patients were operated off pump. Standard use of CPB and aortic cross-clamping was employed in 387 patients. Single-clamp technique for aortic cross-clamping was used in 53% of the patients. Cold blood cardioplegia was used for myocardial protection in the majority of these patients (81%). At one center cold crystalloid cardioplegia was used during the first half of the trial.

Postoperative sedation was achieved with propofol. Postoperative analgesia regimen consisted of ketobemidone 7-15 µg kg-1 BW administered intermittent intravenously and acetaminophen 1 g every 6th hour.

Extubation was performed when body temperature reached a level above 37C, hemodynamic values were stable including a mixed venous saturation exceeding 55 %, PO2 was above 10 kPa with FiO2 0.4 and PCO2 was below 6.5 kPa with a respiratory rate less than 30 and drainage loss was less than 100 ml per hour and declining.

After discharge from the ICU patients were transferred to a step-down semi-intensive care unit for at least 24 hours before going to the general ward.

**Table S1**. NT-proBNP in patients with or without inotropes in the whole cohort

|  | Inotropes  (n=95) | Without inotropes  (n=304) | p- value |
| --- | --- | --- | --- |
| NT-proBNP Pre (ng•L-1) | 850 [440 - 2430] | 305 [128 - 819] | <0.0001 |
| NT-proBNP POD1 (ng•L-1) | 3155 [1990 - 5380] | 1870 [1234 - 3274] | <0.0001 |
| NT-proBNP POD3 (ng•L-1) | 4508 [3025 - 8140] | 3445 [1955 - 5490] | <0.0001 |
| Delta NT-proBNP POD1-Pre (ng•L-1) | 1949 [1200 - 3575] | 1500 [991 - 2445] | 0.004 |
| Delta NT-proBNP POD3-Pre (ng•L-1) | 3615 [2152 - 7090] | 2898 [1580 - 4794] | 0.013 |

Data given as medians [interquartile range] or percentages (number). POD: postoperative day.

**Table S2.** NT-proBNP in patients treated with inotropes in the whole cohort

|  | Glutamate  (n=56) | Control  (n=39) | p-value |
| --- | --- | --- | --- |
| NT-proBNP Pre (ng•L-1) | 780 [380 - 1970] | 1140 [510 - 2920] | 0.25 |
| NT-proBNP POD1 (ng•L-1) | 2970 [1777 - 5258] | 3770 [2255 - 8060] | 0.08 |
| NT-proBNP POD3 (ng•L-1) | 4230 [2610 - 6740] | 6030 [3950-13950] | 0.012 |
| Delta NT-proBNP POD1-Pre (ng•L-1) | 1660 [920 - 3130] | 2713 [1520-5560] | 0.022 |
| Delta NT-proBNP POD3-Pre (ng•L-1) | 3338 [1500 - 4950] | 4205 [2630-11210] | 0.018 |

Data given as medians [interquartile range] or percentages (number). POD: postoperative day.

**Table S3.** NT-proBNP in patients treated with inotropes and EuroSCORE II≥ 4.15

|  | Glutamate  (n=24) | Control  (n=19) | p-value |
| --- | --- | --- | --- |
| NT-proBNP Pre (ng•L-1) | 1880 [589 - 3490] | 2910 [875 -3820] | 0.41 |
| NT-proBNP POD1 (ng•L-1) | 5365 [2970 - 8300] | 6650 [4640 -12400] | 0.30 |
| NT-proBNP POD3 (ng•L-1) | 5140 [3800 -7365] | 12300 [6195-19450] | 0.011 |
| Delta NT-proBNP POD1-Pre (ng•L-1) | 2390 [1132 - 5100] | 5330 [1530 - 11210] | 0.13 |
| Delta NT-proBNP POD3-Pre (ng•L-1) | 3902 [3260 - 5459] | 8630 [4205 - 14050] | 0.034 |

Data given as medians [interquartile range] or percentages (number). POD: postoperative day

**References**

1. Vidlund M, Hakanson E, Friberg O, Juhl-Andersen S, Holm J, Vanky F, Sunnermalm L, Borg JO, Sharma R, Svedjeholm R. GLUTAMICS--a randomized clinical trial on glutamate infusion in 861 patients undergoing surgery for acute coronary syndrome. J Thorac Cardiovasc Surg. 2012;144:922-30 e7.

2. Vanhanen I, Svedjeholm R, Hakanson E, Joachimsson PO, Jorfeldt L, Nilsson L, Vanky F. Assessment of myocardial glutamate requirements early after coronary artery bypass surgery. Scand Cardiovasc J. 1998;32:145-52.

3. Svedjeholm R, Hakanson E, Szabo Z. Routine SvO2 measurement after CABG surgery with a surgically introduced pulmonary artery catheter. Eur J Cardiothorac Surg. 1999;16:450-7.

4. Holm J, Hakanson RE, Vanky F, Svedjeholm R. Mixed venous oxygen saturation is a prognostic marker after surgery for aortic stenosis. Acta Anaesthesiol Scand. 2010;54:589-95.

5. Holm J, Hakanson E, Vanky F, Svedjeholm R. Mixed venous oxygen saturation predicts short- and long-term outcome after coronary artery bypass grafting surgery: a retrospective cohort analysis. Br J Anaesth. 2011;107:344-50.

6. Svedjeholm R, Vidlund M, Vanhanen I, Hakanson E. A metabolic protective strategy could improve long-term survival in patients with LV-dysfunction undergoing CABG. Scand Cardiovasc J. 2010;44:45-58.

7. Dahlin LG, Kagedal B, Nylander E, Olin C, Rutberg H, Svedjeholm R. Unspecific elevation of plasma troponin-T and CK-MB after coronary surgery. Scand Cardiovasc J. 2003;37:283-7.
